# Supplementary material
Source: HighWire-hosted journal article supplement (https://dmd.aspetjournals.org/highwire/filestream/79820/field_highwire_adjunct_files/0/1024_supp_data.pdf)
Supplement: 1024_supp_data.pdf [file 1024_supp_data.pdf]

**Drug Metabolism and Disposition article DMD-AR-2022-001024**

**Contribution of UGT enzymes to human drug metabolism stereoselectivity: a case study of medetomidine, RO5263397, propranolol and testosterone**

## **Supplemental Information**

Nicolò Milani, NaHong Qiu and Stephen Fowler

Pharmaceutical Sciences, Roche Pharma Research and Early Development, Roche Innovation Centre Basel, Grenzacherstrasse 124, 4070, Basel, Switzerland (NM, NQ, SF) and Department of Chemistry, Biology and Biotechnology, University of Perugia, 06123 Perugia, Italy (NM).

**Turnover of RO5263397 and RO5263396 by recombinantly expressed UGT2B10 and UGT1A4**

*Experimental Method:*

UGT2B10 and UGT1A4 were prepared in the same Tris buffer as HLM, but at a protein concentration of 0.55 mg/mL (final concentration: 0.50 mg/mL) and without the pre-treatment with alamethicin. Incubation procedure was as for UGT incubations described above; RO5263397, RO5263396 and medetomidine enantiomers were incubated at a concentration of 1  $\mu$ M. Sampling points were: 0.5, 3.5, 6.5, 10, 15, 30, 45, and 90 minutes and 40  $\mu$ L of each incubation mixture was removed and pipetted into 384-well deep well plates preloaded with 80  $\mu$ L quench solution (chilled acetonitrile containing 500 ng/mL of D<sub>6</sub>-midazolam as internal standard).

*Results:*

RO5263397 has previously been shown to be selectively metabolized by UGTs and in particular by UGT2B10 (Fowler et al., 2015; Milani et al., 2020); intrinsic clearance of its enantiomer RO5263396 by UGTs was not measurable and the glucuronide formation rate was not quantifiable and it demonstrated a very high UGT metabolic stability of RO5263396 (Supplementary Information Figure S1). Levomedetomidine and dexmedetomidine were metabolized by UGT2B10 with intrinsic clearances of  $27 \pm 1$  and  $2.6 \pm 0.3$   $\mu$ L/min/mg, respectively. (UGT1A4 Clint values were below limit of quantitation.) Therefore the most active isomer UGT2B10 metabolized levomedetomidine 10-fold faster than dexmedetomidine. Conversely, the metabolism of dexmedetomidine was indicated by the metabolite peak formation rates to be 2-fold faster than that of levomedetomidine in recombinant UGT1A4 incubations.

Figure S1. Activity of UGT2B10 and UGT1A4 enzyme preparations in the metabolism of RO5263397/6 and Medetomidine

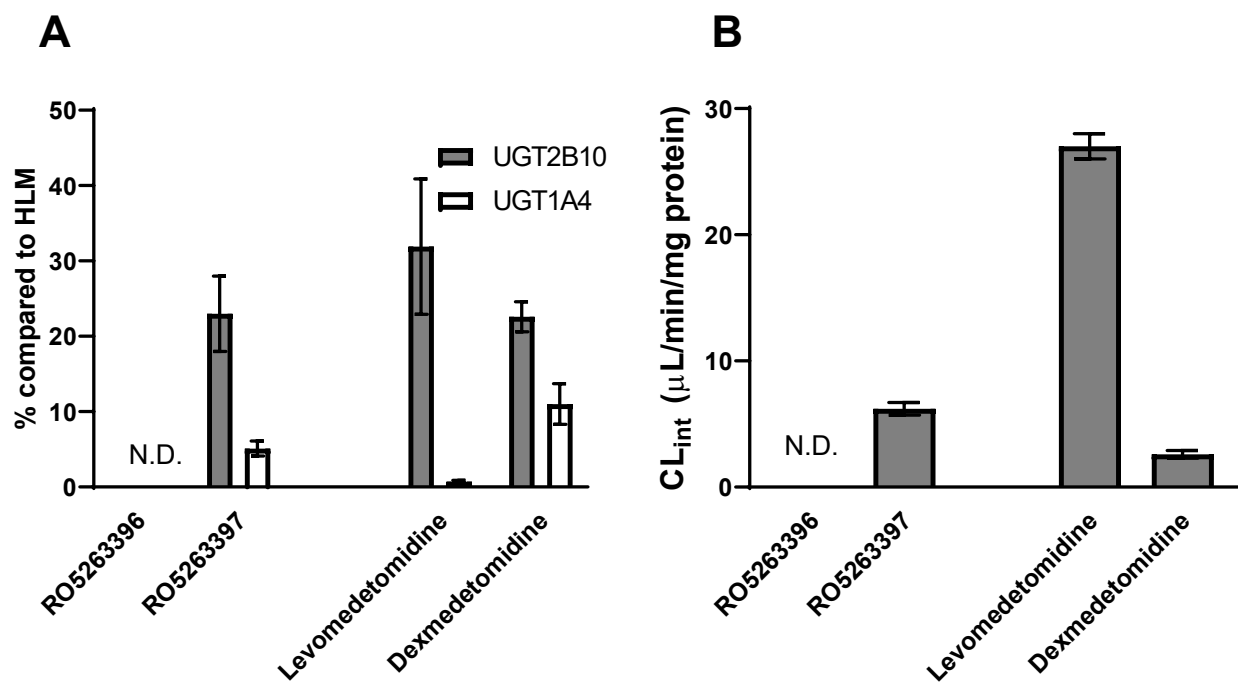

A) Activity of UGT2B10 and UGT1A4 for RO5263396/7 and medetomidine enantiopairs as percentage of clearance in the HLM.

B) CL<sub>int</sub> in the recombinant UGT2B10 incubations.

N.D. not detectable since it was below the limit of quantification (1 μL/min/mg)

*Impact of UGT Stereoselectivity on Drug Clearance*

**Supplemental Table 1: Measured Intrinsic Clearances of Medetomidine, RO5263397, Propranolol and Testosterone in Liver Microsomes without BSA Supplementation**

| Compound   |        | Medetomidine |          |       | RO5263397/6 |           |        | Propranolol |           |       | Testosterone |         |       |
|------------|--------|--------------|----------|-------|-------------|-----------|--------|-------------|-----------|-------|--------------|---------|-------|
|            |        | Levo         | Dex      | Ratio | RO5263397   | RO5263396 | Ratio  | S           | R         | Ratio | Epi          | Test    | Ratio |
|            |        | μL/min/mg    |          |       | μL/min/mg   |           |        | μL/min/mg   |           |       | μL/min/mg    |         |       |
| Human      | UDPGA* | 120 ±9       | 14 ±2    | 8.6   | 36 ±1       | BLQ       | > 36   | BLQ         | BLQ       | ND    | 353 ±5       | 105 ±4  | 3.4   |
|            | NADPH  | 6.0 ±3.2     | 8.5 ±1.9 | 0.49  | BLQ         | BLQ       | ND     | 18 ± 1      | 105 ±7    | 0.17  | 11 ±3        | 14 ±2   | 0.79  |
|            | Sum    | 1            | 22.5     | 5.6   | 36          | BLQ       | 36     | 18          | 105       | 0.17  | 364          | 119     | 3.1   |
| Cynomolgus | UDPGA  | BLQ          | BLQ      | ND    | BLQ         | BLQ       | ND     | 1.9 ± 0.7   | 1.2 ± 0.5 | 1.6   | >1000        | 161 ±6  | >6.2  |
|            | NADPH  | 6.2 ±1       | 20 ±1.6  | 0.31  | BLQ         | 4.3 ±1.9  | <0.23  | 240 ±28     | >1000     | <0.24 | 793 ±30      | 273 ±8  | 2.9   |
| Rat        | UDPGA  | BLQ          | BLQ      | ND    | BLQ         | BLQ       | ND     | BLQ         | BLQ       | ND    | 19 ±2        | 245 ±8  | 0.076 |
|            | NADPH  | 10 ±1        | 22 ±1    | 0.45  | BLQ         | 12 ±5     | <0.083 | >1000       | 852 ±71   | >1.2  | >1000        | 890 ±86 | >1.1  |
| Mouse      | UDPGA  | BLQ          | BLQ      | ND    | BLQ         | BLQ       | ND     | BLQ         | BLQ       | ND    | 3.9 ± 2.3    | 60 ±5   | 0.065 |
|            | NADPH  | 19 ±3        | 15 ±3    | 1.3   | BLQ         | 6.9 ±6.0  | <0.14  | 72 ±7       | 208 ±15   | 0.35  | 333 ±36      | 402 ±17 | 0.812 |
| Dog        | UDPGA  | 4.1 ±1.2     | BLQ      | >4.1  | BLQ         | BLQ       | ND     | 4.7 ±0.9    | BLQ       | >4.7  | 34 ±3        | 843 ±42 | 0.040 |
|            | NADPH  | 9.6 ±2.7     | 16 ±4    | 0.60  | 10 ± 4      | 8.7 ±3.7  | 1.1    | 186 ±13     | 156 ±23   | 1.2   | 116 ±6       | 127 ±5  | 0.91  |
| Minipig    | UDPGA  | BLQ          | BLQ      | ND    | BLQ         | BLQ       | ND     | BLQ         | 3.3 ±0.6  | <0.30 | 23 ±2        | 63 ±1   | 0.40  |
|            | NADPH  | 8.4 ±2.0     | 10 ±1    | 0.84  | BLQ         | 6.4 ±4.0  | <0.16  | >1000       | 360 ±43   | >2.8  | 185 ±9       | 125 ±6  | 1.5   |

\*Relative rates of initial glucuronide formation by pooled HLM assuming equal LC-MS/MS response of glucuronides: RO5263397/RO5263396: 74; S-Propranolol/R-Propranolol: 6.6 (see also Supplemental Table 2)

notes: sum only calculated for man since the rest is descriptive; values not calculated where  $CL_{int} < 1 \mu\text{L}/\text{min}/\text{mg}$ ; values are a starting point

BLQ: not determined since the  $CL_{int}$  was below the limit of quantification ( $1 \mu\text{L}/\text{min}/\text{mg}$ )

ND: not determined

**Supplemental Table 2: Measured (Bound) intrinsic Clearance and Calculated Unbound Intrinsic Clearances of Medetomidine, RO5263397, Propranolol and Testosterone in Incubations with Pooled HLM in presence and absence of BSA.**

|                                                        | CL <sub>int</sub>         |      |                    |                               |      |                    | Glucuronide Peak Appearance Rate (Peak Area Glucuronide/Peak Area Internal Standard per minute) |        |                    |             |        |                    |
|--------------------------------------------------------|---------------------------|------|--------------------|-------------------------------|------|--------------------|-------------------------------------------------------------------------------------------------|--------|--------------------|-------------|--------|--------------------|
|                                                        | Medetomidine<br>μL/min/mg |      |                    | Epi/Testosterone<br>μL/min/mg |      |                    | RO5263396/7                                                                                     |        |                    | Propranolol |        |                    |
|                                                        | Levo                      | Dex  | Ratio <sup>a</sup> | Epi                           | Test | Ratio <sup>a</sup> | S                                                                                               | R      | Ratio <sup>a</sup> | S           | R      | Ratio <sup>a</sup> |
| - BSA observed                                         | 120                       | 14   | 8.6                | 353                           | 104  | 3.4                | 0.35                                                                                            | 0.0047 | 74                 | 0.011       | 0.0017 | 6.6                |
| + BSA observed                                         | 96                        | 11   | 8.7                | 597                           | 43   | 14                 | 0.56                                                                                            | 0.0043 | 130                | 0.085       | 0.012  | 7.0                |
| - BSA free fraction corrected                          | 235                       | 26   | 9.0                | 559                           | 149  | 3.8                | 0.51                                                                                            | 0.0067 | 77                 | 0.085       | 0.0044 | 6.6                |
| + BSA free fraction corrected                          | 300                       | 34   | 8.7                | 5012                          | 424  | 12                 | 0.82                                                                                            | 0.0059 | 139                | 0.40        | 0.029  | 14                 |
| ratio CL <sub>int</sub> +BSA/-BSA <sup>b</sup>         | 0.80                      | 0.79 |                    | 1.7                           | 0.41 |                    | 1.6                                                                                             | 0.91   |                    | 7.6         | 7.1    |                    |
| ratio unbound CL <sub>int</sub> +BSA/-BSA <sup>c</sup> | 1.3                       | 1.3  |                    | 9.0                           | 2.5  |                    | 1.6                                                                                             | 0.89   |                    | 14          | 6.6    |                    |

<sup>a</sup> Ratio between CL<sub>int</sub> or CL<sub>int,u</sub> for the respective enantiomers

<sup>b</sup> Effect of BSA for each enantiomer on the CL<sub>int</sub>

<sup>c</sup> Effect of BSA for each enantiomer on the CL<sub>int,u</sub>

**Supplemental Table 3: Glucuronide formation ratio of S and R propranolol in presence and absence of BSA in HLM , HIM, and HKM.**

| Enantiomer    | Condition | Glucuronide formation rate |       |                                         |       |                  |       |
|---------------|-----------|----------------------------|-------|-----------------------------------------|-------|------------------|-------|
|               |           | HLM                        | Ratio | HIM                                     | Ratio | HKM              | Ratio |
| S-propranolol | No BSA    | 0.0112 ± 0.003             | 7.6   | $7.4 \cdot 10^{-4} \pm 1 \cdot 10^{-5}$ | 5.0   | 0.0062± 0.0003   | 12    |
|               | BSA       | 0.085 ± 0.001              |       | 0.0037± 0.0001                          |       | 0.076± 0.002     |       |
| R-propranolol | No BSA    | 0.00170 ± 0.00051          | 7.1   | $2.4 \cdot 10^{-4} \pm 1 \cdot 10^{-5}$ | 6.5   | 0.00124± 0.00007 | 12    |
|               | BSA       | 0.0121 ± 0.0002            |       | 0.00157± 0.00003                        |       | 0.0153±0.0003    |       |

**Supplemental Table 4: MS/MS parameters and retention time for all enantiomers**

| Compound                | Chromatography* | Parent      |          | Metabolite  |       |             | DP<br>(Volts) | CE<br>(Volts) |
|-------------------------|-----------------|-------------|----------|-------------|-------|-------------|---------------|---------------|
|                         |                 | Q1-Q3       | RT (min) | Q1-Q3       | Conf. | RT<br>(min) |               |               |
| Medetomidine            | A               | 201.0-94.9  | 0.65     | 377.0-201.0 | Levo  | 0.70        | 70            | 25            |
|                         |                 |             |          |             | Dex   | 0.68        |               |               |
| RO5263396/<br>RO5263397 | B               | 195.1-152.1 | 0.58     | 371.1-195.1 | R     | 0.55        | 76            | 21            |
|                         |                 |             |          |             | S     | 0.62        |               |               |
| Propranolol             | C               | 260.2-116.1 | 0.66     | 436.2-260.2 | R     | 0.67        | 70            | 25            |
|                         |                 |             |          |             | S     | 0.77        |               |               |
| Epi/Testosterone        | B               | 289.2-109   | 1.38     | 465.289.2   | Epi.  | 1.18        | 80            | 30            |
|                         |                 |             | 1.31     |             | Test. | 1.11        |               |               |

\*See Table 5

**Supplemental Table 5: Chromatography programs of all enantiopairs**

| Medetomidine (A)  |                                                           |                      |
|-------------------|-----------------------------------------------------------|----------------------|
| Column            | ACQUITY UPLC BEH C18 Column, 130Å, 1.7 µm, 2.1 mm X 50 mm |                      |
| Column Temp. (°C) | 50                                                        |                      |
| Injection volume  | 2 µL                                                      |                      |
| Solvent A         | Water + 0.1% HCOOH                                        |                      |
| Solvent B         | AcN + 0.1% HCOOH                                          |                      |
| Time (min)        | <b>% Solvent B</b>                                        | <b>Flow (mL/min)</b> |
| 0                 | 15                                                        | 0.6                  |
| 1.30              | 40                                                        |                      |
| 1.31              | 98                                                        | 1.2                  |
| 1.60              | 98                                                        |                      |
| 1.61              | 15                                                        |                      |
| 2.00              | 15                                                        | 0.6                  |

| RO5263396/7 & Epi_Testosterone (B) |                                                           |                      |
|------------------------------------|-----------------------------------------------------------|----------------------|
| Column                             | ACQUITY UPLC BEH C18 Column, 130Å, 1.7 µm, 2.1 mm X 50 mm |                      |
| Column Temp. (°C)                  | 50                                                        |                      |
| Injection volume                   | 2 µL                                                      |                      |
| Solvent A                          | Water + 0.1% HCOOH                                        |                      |
| Solvent B                          | AcN + 0.1% HCOOH                                          |                      |
| Time (min)                         | <b>% Solvent B</b>                                        | <b>Flow (mL/min)</b> |
| 0                                  | 5                                                         | 0.6                  |
| 1.29                               | 60                                                        |                      |
| 1.30                               | 98                                                        | 1.2                  |
| 1.60                               | 98                                                        |                      |
| 1.61                               | 5                                                         |                      |
| 2.00                               | 5                                                         | 0.6                  |



| Propranolol (C)   |                                                           |                      |
|-------------------|-----------------------------------------------------------|----------------------|
| Column            | ACQUITY UPLC BEH C18 Column, 130Å, 1.7 µm, 2.1 mm X 50 mm |                      |
| Column Temp. (°C) | 50                                                        |                      |
| Injection volume  | 2 µL                                                      |                      |
| Solvent A         | Water + 0.1% HCOOH                                        |                      |
| Solvent B         | AcN + 0.1% HCOOH                                          |                      |
| Time (min)        | <b>% Solvent B</b>                                        | <b>Flow (mL/min)</b> |
| 0                 | 15                                                        | 0.6                  |
| 1.30              | 45                                                        |                      |
| 1.31              | 98                                                        | 1.2                  |
| 1.60              | 98                                                        |                      |
| 1.61              | 15                                                        |                      |
| 2.00              | 15                                                        | 0.6                  |
